# Supplementary material for: Nanog Signaling Mediates Radioresistance in ALDH-Positive Breast Cancer Cells
Source: Int J Mol Sci. 2019 Mar 6;20(5):1151. doi: 10.3390/ijms20051151 (PMC6429380; doi:10.3390/ijms20051151)
Supplement: Supplementary file 1 [file ijms-20-01151-s001.zip]

Archive with 10 entries (10 files):
- Figure legends of Supplementary data.pdf
- Supplementary Figure S1.tif
- Supplementary Figure S2.tif
- Supplementary Figure S3.tif
- Supplementary Figure S4.tif
- Supplementary Figure S6.tif
- Supplementary Figure S7.tif
- Supplementary Figure S8.tif
- Supplementary Figure S9.tif
- Supplementray Figure S5.tif
